# Supplementary material for: Scalable MXene and PEDOT-CNT Nanocoatings for Fibre-Reinforced Composite De-Icing
Source: MDPI journal article supplement (doi:10.3390/ma15103535), 2022-05-14
Supplement: s1 [file s1]

# Scalable MXene and PEDOT-CNT Nanocoatings for Fibre-Reinforced Composite De-Icing

Gediminas Monastyreckis <sup>1,\*</sup>, Juan Tortosa Siles <sup>1</sup>, Petr Knotek <sup>2</sup>, Maria Omastova <sup>3</sup>, Andrey Aniskevich <sup>4</sup> and Daiva Zeleniakiene <sup>1</sup>

<sup>1</sup> Department of Mechanical Engineering, Kaunas University of Technology, Studentu St. 56, 51424 Kaunas, Lithuania; j.tortosa@alumnos.upm.es (J.T.S.); daiva.zeleniakiene@ktu.lt (D.Z.)

<sup>2</sup> Department of General and Inorganic Chemistry, University of Pardubice, Studentska 573, 532 10 Pardubice, Czech Republic; petr.knotek@upce.cz

<sup>3</sup> Polymer Institute, Slovak Academy of Sciences, Dubravska cesta 9, 845 41 Bratislava Slovakia; maria.omastova@savba.sk

<sup>4</sup> Institute for Mechanics of Materials, University of Latvia, Jelgavas Str. 3, LV-1004 Riga, Latvia; andrey.aniskevich@pmi.lv

\* Correspondence: gediminas.monastyreckis@ktu.edu; Tel.: +370-61104007

## 2.2. Coating preparation

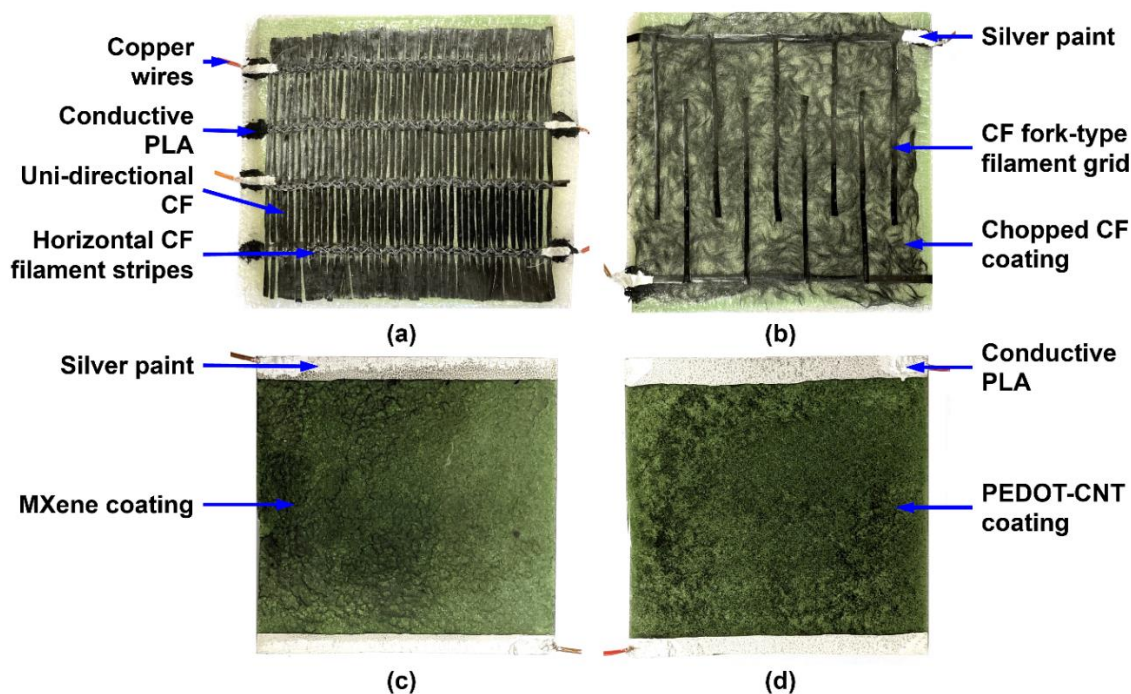

**Figure S1.** Sandwich structured GFRP composite samples coated with: (a) unidirectional CF; (b) chopped CF; (c)  $\text{Ti}_3\text{C}_2\text{T}_z$  MXenes; (d) PEDOT-CNT.

### 2.3. Characterisation and testing

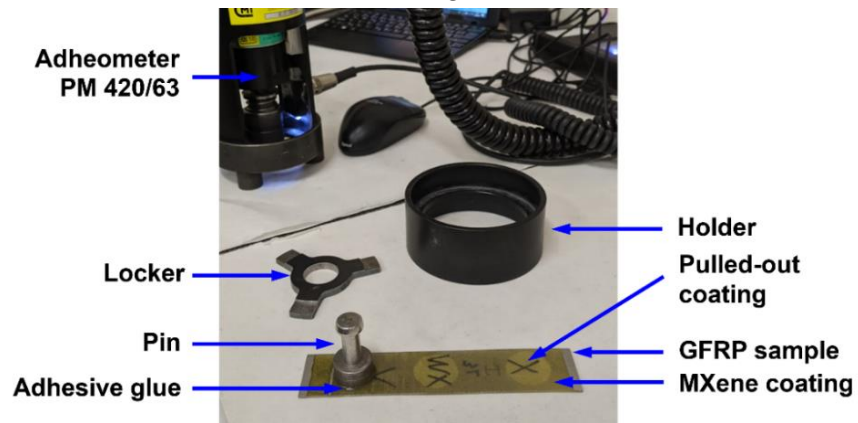

Figure S2. Adhesion test setup.

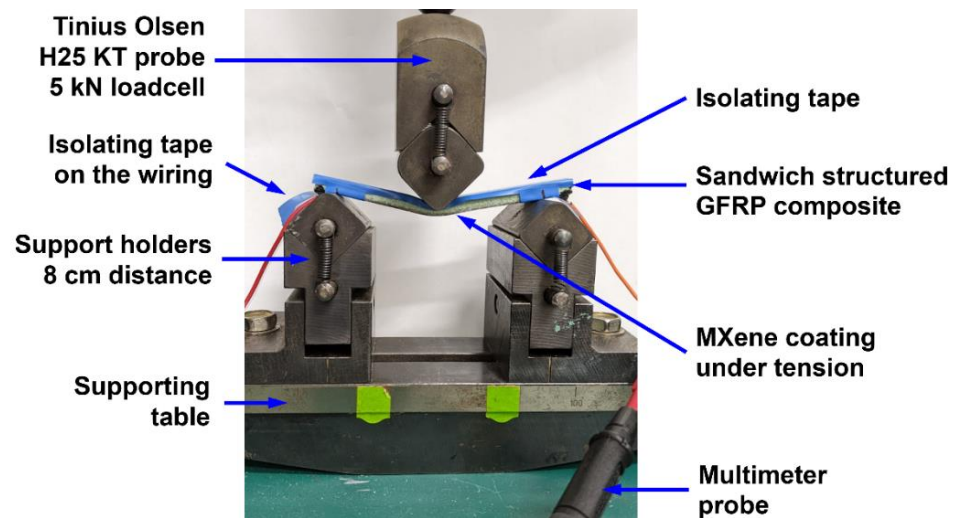

Figure S3. Three-point bending test setup.

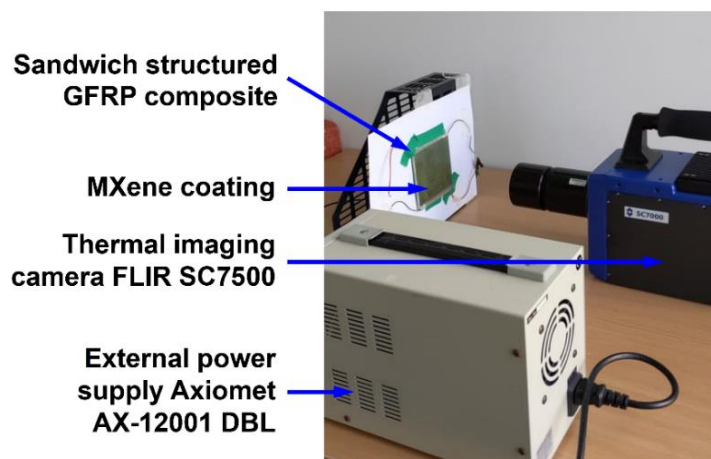

Figure S4. Thermal imaging test setup.

### 3.4. Thermal imaging and de-icing

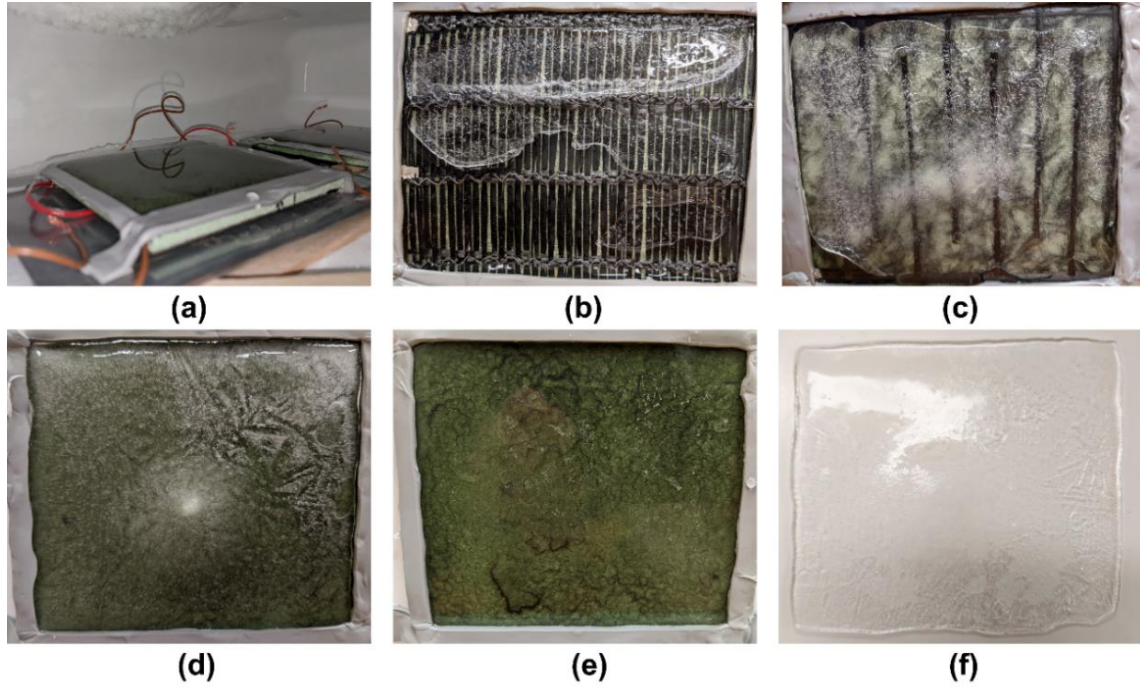

**Figure S5.** De-icing test: (a) ice formation in a -15 °C freezer (horizontal). De-icing (vertically positioned sample) at room temperature under 7.44 W power of: (b) unidirectional CF coating after 12 min of heating; (c) chopped CF coating after 7 min; (d) MXene coating after 1 min; (e) a fully de-iced MXene coating after 5 min; (f) detached ice after 5 min of MXene coating.
